# Supplementary material for: Ultrafast synthesis of highly luminescent green- to near infrared-emitting CdTe nanocrystals in aqueous phase
Source: Royal Society of Chemistry journal article supplement (doi:10.1039/b801418c), 2008-01-01
Supplement: b801418c.pdf [file b801418c.pdf]

**Supporting Information**

**Rapid and Convenient Synthesis of Highly Luminescent Green- to Near  
Infrared-Emitting CdTe Nanocrystals in Aqueous Phase**

L. Zou, Z. Gu, N. Zhang, Y. Zhang, Z. Fang, W. Zhu, and X. Zhong

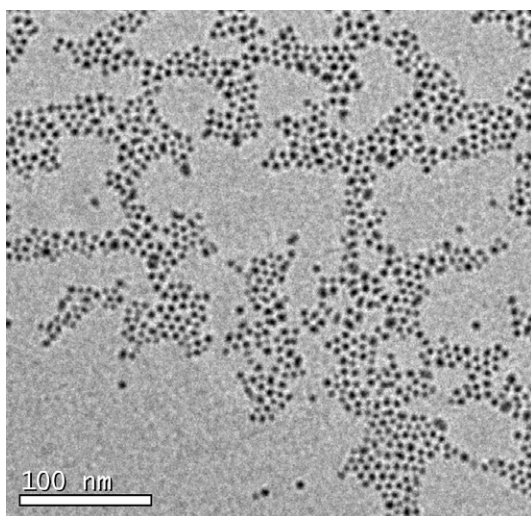

**Fig. S1** TEM image of CdTe NCs with diameter  $4.8 \pm 0.4$  nm and emission wavelength 709 nm growing at 100 °C for 30 min.

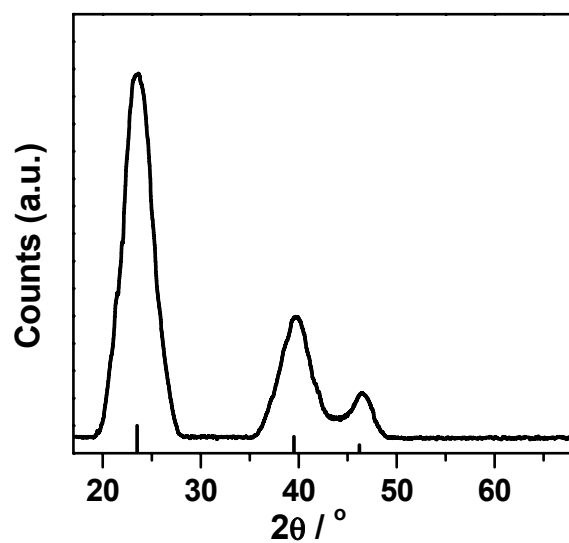

**Fig. S2** p-XRD spectra of CdTe nanocrystals sample. The line spectrum (bottom) indicates the reflections of cubic bulk CdTe materials.

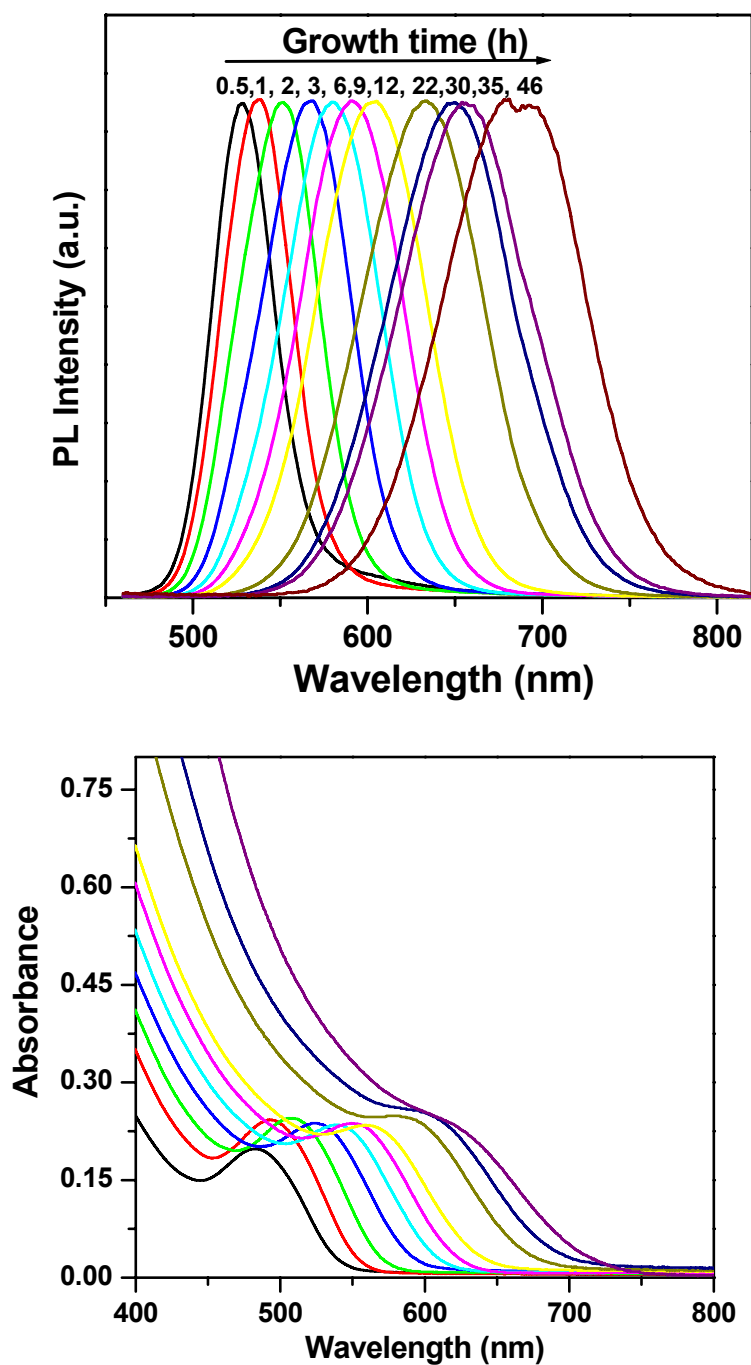

**Fig. S3** Temporal evolution of normalized PL (up,  $\lambda_{\text{ex}} = 400$  nm) and corresponding UV-vis spectra (bottom) of MPA capped CdTe QDs prepared under the normal literature recipe with Cd/MPA/Te molar ratios of 1:2.4:0.5, pH 9.0, and [Cd] 5.0 mM.

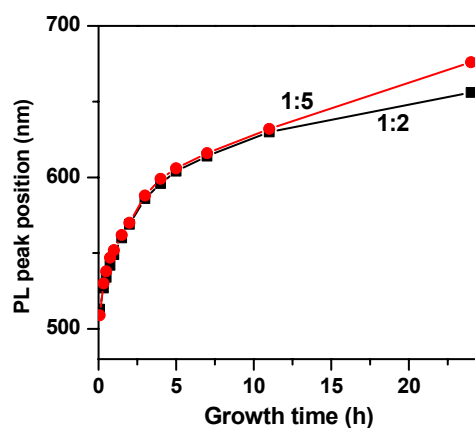

**Fig. S4.** Temporal evolution of PL peak of CdTe QDs growth under different Te/Cd ratios with fixation of pH 9.0.

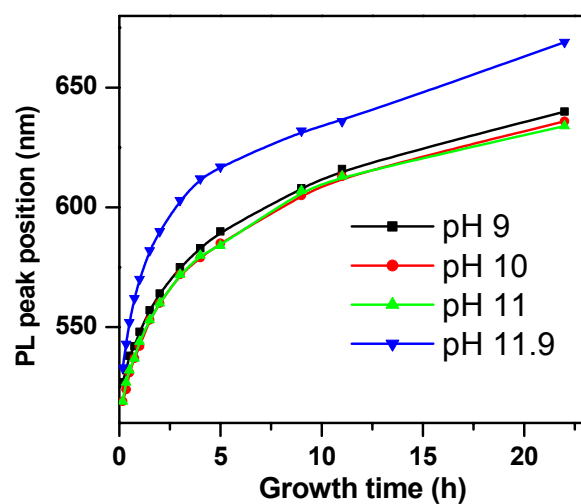

**Fig. S5.** Temporal evolution of PL peak of CdTe QDs growth under varied pH values with fixation of Te/Cd ratio of 1:2.
